# Supplementary material for: A Raman spectroscopic study of the natural carbonophosphates Na&lt;sub&gt;3&lt;/sub&gt;&lt;i&gt;M&lt;/i&gt;CO&lt;sub&gt;3&lt;/sub&gt;PO&lt;sub&gt;4&lt;/sub&gt; (&lt;i&gt;M&lt;/i&gt; is Mn, Fe, and Mg)
Source: Copernicus journal article supplement (doi:10.5194/ejm-33-283-2021), 2021-05-11
Supplement: Supplementary file 1 [file ejm-33-283-2021-supplement.zip]

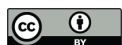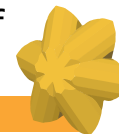

*Supplement of*

**A Raman spectroscopic study of the natural carbonophosphates  $\text{Na}_3M\text{CO}_3\text{PO}_4$  ( $M$  is Mn, Fe, and Mg)**

**Evgeniy Nikolaevich Kozlov et al.**

*Correspondence to:* Evgeniy Nikolaevich Kozlov ([kozlov\\_e.n@mail.ru](mailto:kozlov_e.n@mail.ru))

- [ejm-33-283-2021-supplement-title-page.pdf](#)
- [Table S1 \(EDX\).xlsx](#)
- [Table S2 \(Raman\).xlsx](#)

The copyright of individual parts of the supplement might differ from the article licence.
